# Supplementary material for: A novel chromogenic host compound that shows sensitive color change upon inclusion crystallizationElectronic supplementary information (ESI) available: molecular structures of 1 and 1·2DMF. See http://www.rsc.org/suppdata/nj/b1/b111359c/
Source: Royal Society of Chemistry journal article supplement (doi:10.1039/b111359c), 2002-03-12
Supplement: b111359c.doc [file b111359c.doc]

Figure 1. Diagram showing the asymmetric unit of **1** and showing atom numbering. Ellipsoids are at the 50% probability level.


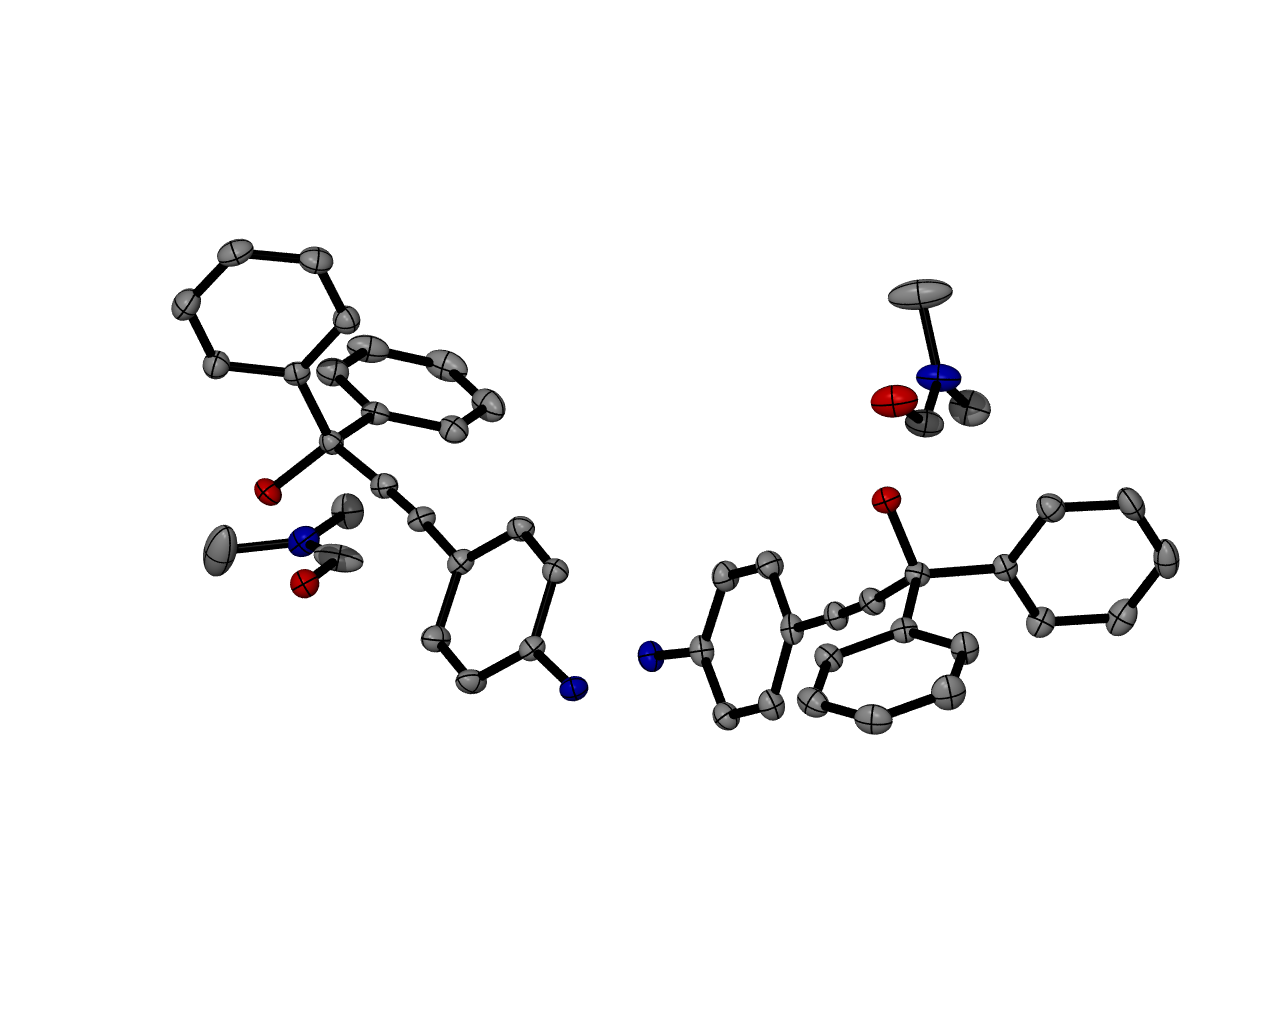


**O1**

**C15**

**C10**

**C20**

**C9**

**C25**

**O1A**

**O1’**

**O1B**

**C9’**

**C10’**

**C15’**

**C20’**

**C25’**

**C1**

**C1’**

**C2’**

**C2**

**N1’**

**N1**

**C4**

**C5**

**C6**

**C3**

**C11**

**C14**

**C8**

**C7**

**C13**

**C12**

**C21**

**C22**

**C23**

**C24**

**C3A**

**C1A**

**N1A**

**C2A**

**C14’**

**C24’**

**C23’**

**C22’**

**C21’**

**C6’**

**C5’**

**C4’**

**C3’**

**C11’**

**C12’**

**C13’**

**C7’**

**C8’**

**N1B**

**C1B**

**C2B**

**C3B**


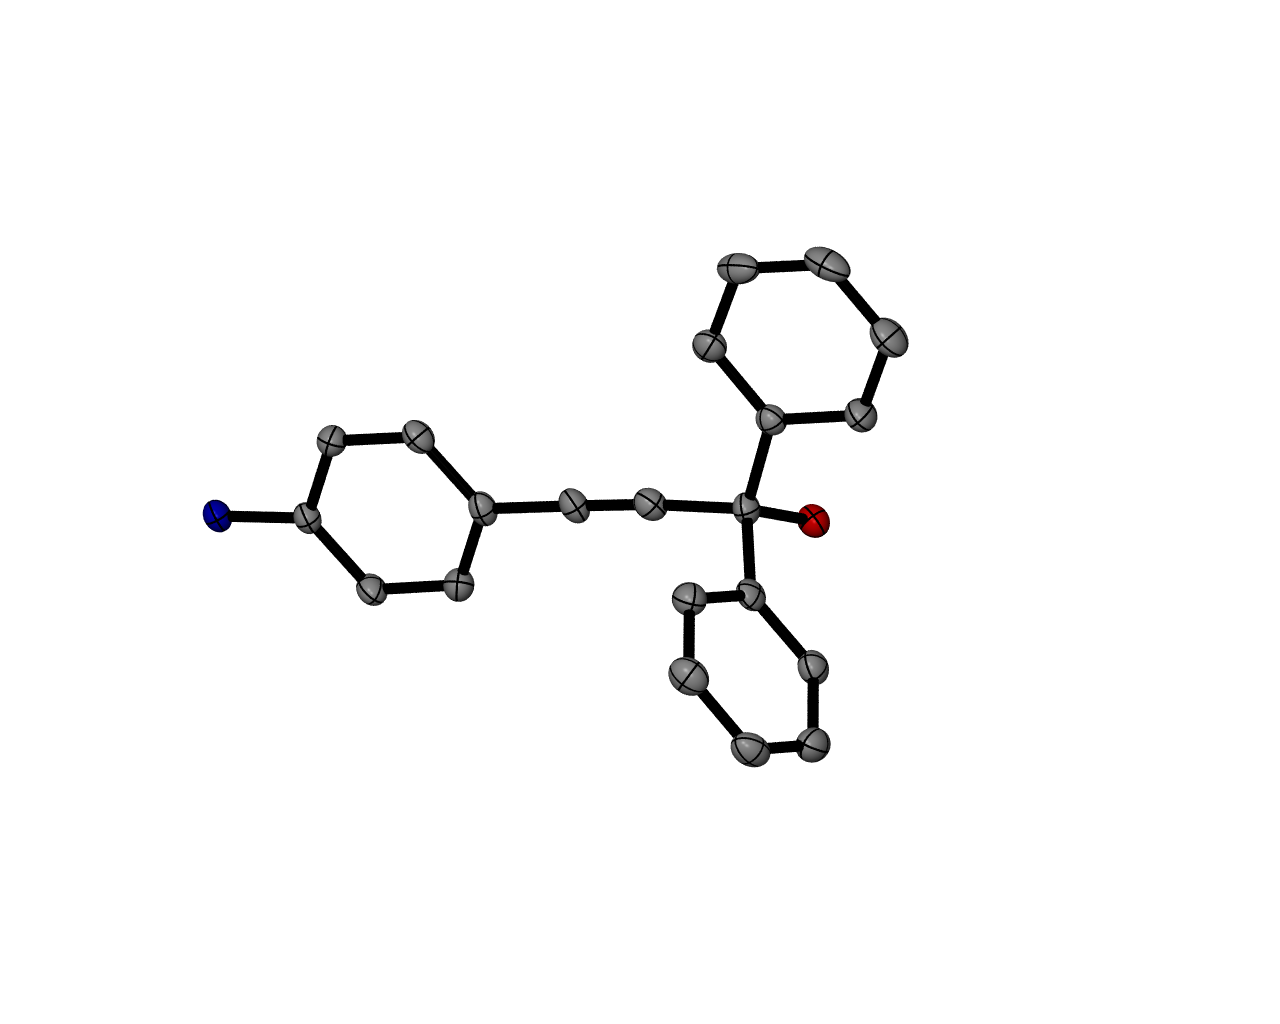


**C20**

**C21**

**C22**

**C25**

**C23**

**C24**

**C11**

**C12**

**C13**

**C14**

**C15**

**C10**

**N1**

**C1**

**C2**

**C3**

**C4**

**C5**

**C6**

**C7**

**O1**

**C8**

**C9**

Figure 2. Diagram showing the asymmetric unit of **1** and showing atom numbering. Ellipsoids are at the 50% probability level and guest disorder is not shown.
